# Supplementary material for: Carbon layer confined Co–Ni bimetallic oxide heterojunctions for high-efficiency electrosynthesis of 2,5-furandicarboxylic acid
Source: Royal Society of Chemistry journal article supplement (doi:10.1039/d4ta01159g), 2024-01-01
Supplement: d4ta01159g1.pdf [file d4ta01159g1.pdf]

Supporting Information

## **Carbon layer confined Co-Ni bimetallic oxide heterojunctions for high-efficiency electrosynthesis of 2,5-furandicarboxylic acid**

Zhong Cheng,<sup>a,c</sup> Jing Hu,<sup>a</sup> Wenjing Zhou,<sup>a</sup> Wenfang Deng,<sup>a,b,\*</sup> Ming Ma,<sup>a,\*</sup> and Yueming Tan,<sup>a,\*</sup>

<sup>a</sup> Key Laboratory of Chemical Biology and Traditional Chinese Medicine Research (Ministry of Education of China), College of Chemistry and Chemical Engineering, Hunan Normal University, Changsha 410081, China

<sup>b</sup> Institute of Interdisciplinary Studies, Hunan Normal University, Changsha 410081, China

<sup>c</sup> College of Chemistry and Chemical Engineering, Hunan University, Changsha, Hunan 410082, China

E-mail: Dengwenfang@hunnu.edu.cn (W. Deng); mingma@hunnu.edu.cn (M. Ma); tanyueming0813@hunnu.edu.cn (Y. Tan).

**Chemicals.** The chemicals of D-glucose (AR), Cobalt acetate tetrahydrate ( $\text{Co}(\text{acac})_2 \cdot 4\text{H}_2\text{O}$ , AR), Nickel acetate tetrahydrate ( $\text{Ni}(\text{acac})_2 \cdot 4\text{H}_2\text{O}$ , AR) and anhydrous ethanol (AR) were purchased from Sinopharm Chemical Reagent Co. Ltd. The chemicals of 5-hydroxymethylfurfural (HMF), 2,5-furandicarboxylic acid (FDCA), 5-hydroxymethyl-2-furancarboxylic acid (HMFCFA), 2,5-diformylfuran (DFF), 5-formyl-2-furancarboxylic acid (FFCA), Nafion (5 wt%) were purchased from Sigma-Aldric. Nickel foam (NF) was purchased from Sheng Qiang Co. Ltd. Deionized (DI) water ( $18.25 \text{ M}\Omega \text{ cm}^{-1}$ ) from a system (Milli-Q) was used in all experiments. All the chemicals were used without purification.

**Instrumentation.** Scanning electron microscope (SEM) images were taken by a FEI SEM450. Scanning transmission electron micrographs (STEM), HAADF-STEM images and energy dispersive X-ray spectroscopy (EDS) elemental mapping were carried out on a Thermo Fisher Scientific Talos F200X S/TEM instrument with an accelerating voltage of 200 kV, respectively. X-ray diffraction (XRD) patterns were obtained with an Ultima IV powder diffractometer using  $\text{Cu K}\alpha$  radiation ( $\lambda = 1.5406 \text{ \AA}$ ). X-ray photoelectron spectra (XPS) was detected by the Thermo ESCALAB 250Xi (Thermo Electron, U.K.) with  $\text{Al K}\alpha$  X-ray source. The Raman spectra were recorded at room temperature on a Thermo DXR instrument with a 780 nm excitation laser.  $\text{N}_2$  adsorption-desorption test was carried out at 77 K using a Micromeritics ASAP 2460 instrument. Zeta potential was performed by Britain-Malvern-Zetasizer Nano ZS90 potential analyzer device. In situ Raman spectra were characterized by the confocal Raman microscope (Horiba JY HR Evolution with 532 nm laser). All electrochemical experiments were performed on a CHI760E electrochemical workstation. The catalyst ink modified nickel foam was used as the working electrode, and a Pt foil ( $1 \text{ cm}^2$ ) and a  $\text{HgO}/\text{Hg}$  (1.0 M KOH) electrode served as the counter and reference electrodes, respectively.

**HPLC analysis.** HPLC (Shimadzu Prominence LC-20AT, Japan), which detector is an ultraviolet-visible detector, was used to analyze HMF and corresponding selective oxidation products. In general, 50  $\mu\text{L}$  of electrolyte was obtained during potentiostatic electrolysis and diluted to 2 ml with ultrapure water, filtrated and analyzing it by HPLC. The wavelength of the UV detector is set to 265 nm, mobile phase A was 5 mM ammonium formate aqueous solution and phase B was methanol, the ratio of A:B is 7:3, flow rate is  $0.6 \text{ mL min}^{-1}$ . Using a  $4.6 \text{ mm} \times 250 \text{ mm}$  Spherigel GWS  $5 \mu\text{m}$  C18 column, each separation lasts for 12 minutes.

The theoretic total charge of HMF electrooxidation is as follows:

$$6 \times (20 \text{ mL}) \times (10 \text{ mM}) \times (6.02 \times 10^{23} \text{ mol/L}) \times (1.6 \times 10^{-19} \text{ C}) = 116 \text{ C}$$

The HMF conversion (%), FDCA yield (%) and faradaic efficiency (%) were calculated using equations (1), (2) and (3), respectively.

$$\text{HMF conversion} = (\text{mol of HMF consumed}) / (\text{mol of initial HMF}) \times 100 \quad (1)$$

$$\text{FDCA yield} = (\text{mol of FDCA formed}) / (\text{mol of initial HMF}) \times 100 \quad (2)$$

$$\text{Faradaic efficiency} = (6 \times F) \times (\text{mol of FDCA formed}) / (\text{total charge}) \times 100 \quad (3)$$

**Theoretical calculation.** All density functional theory (DFT) calculations were conducted via the Vienna ab initio simulation package (VASP). The generalized gradient approximation (GGA) functional of Perdew, Burke, and Ernzerhof (PBE) was employed for the electron exchange and correlation energy for structural relaxation. The energy cutoff for the plane wave basis expansion was set to 450 eV and the force on each atom less than  $0.02 \text{ eV}/\text{\AA}$  was set for the convergence criterion of geometry relaxation. The energy convergence criterion was  $10^{-4} \text{ eV}$ . A vacuum layer of  $20 \text{ \AA}$  was adopted to avoid the interaction between contiguous period layers. The Ni(200) and  $\text{Co}_3\text{O}_4(220)$  surfaces were chosen to construct the

heterojunction structure taking into account the crystal plane and lattice matching rules. The HMF adsorption energy was calculated by the following equation:

$$E_{\text{surface-HMF}} = E_{\text{surface-HMF}} - E_{\text{surface}} - E_{\text{HMF}}$$

where  $E_{\text{surface-HMF}}$ ,  $E_{\text{surface}}$  and  $E_{\text{HMF}}$  represent the total energy of the pristine surface with HMF, surface energies and the energy of HMF, respectively. The Gibbs free energy change ( $\Delta G$ ) of each step is calculated using the following formula:

$$\Delta G = \Delta E + \Delta ZPE - T\Delta S$$

where  $\Delta E$  is the electronic energy difference directly obtained from DFT calculations,  $\Delta ZPE$  is the zero point energy difference,  $T$  is the room temperature (298.15 K) and  $\Delta S$  is the entropy change. ZPE could be obtained after frequency calculation.

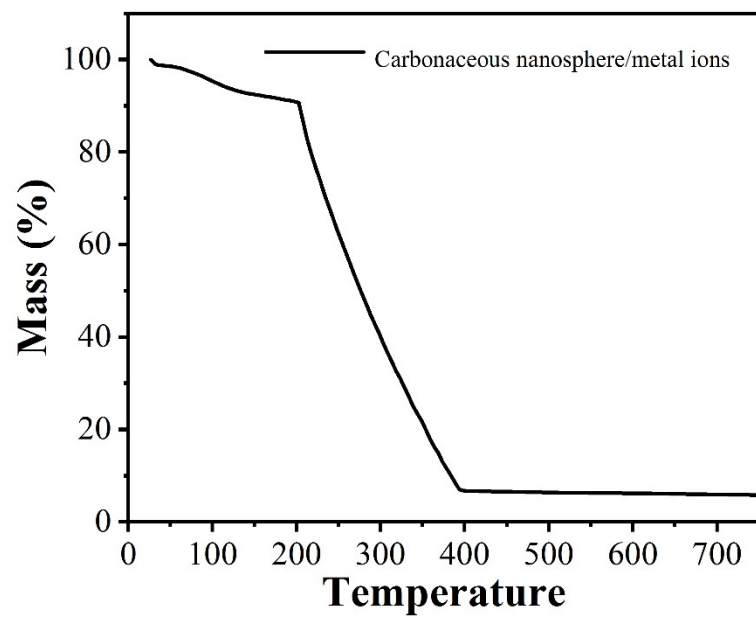

**Fig. S1.** TGA profile of CNS/metal ions in an air atmosphere.

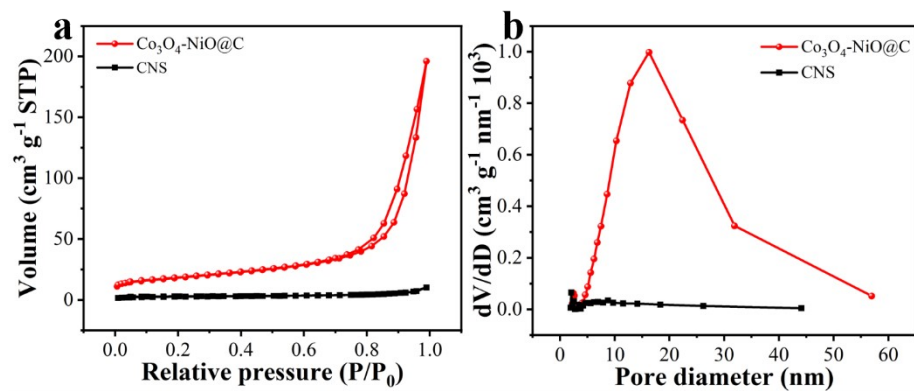

**Fig. S2.** (a)  $\text{N}_2$  adsorption-desorption isotherms and (b) pore size distribution of  $\text{Co}_3\text{O}_4\text{-NiO@C}$  and CNS.

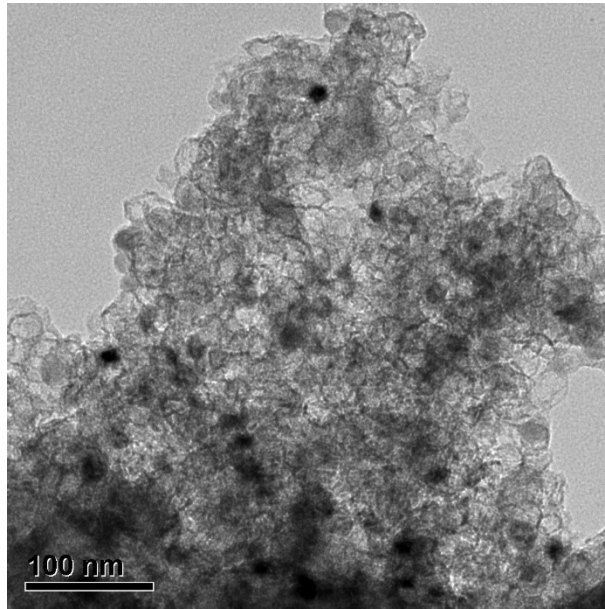

**Fig. S3.** TEM image of Co<sub>3</sub>O<sub>4</sub>-NiO@C after acid treatment.

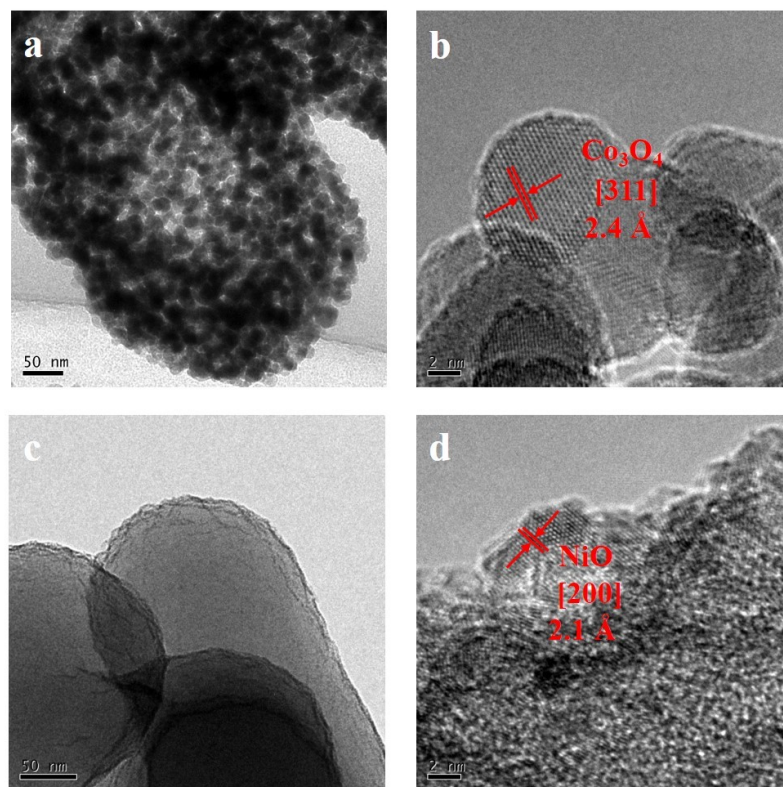

**Fig. S4.** TEM and HRTEM images of (a, b) Co<sub>3</sub>O<sub>4</sub>@C and (c, d) NiO@C.



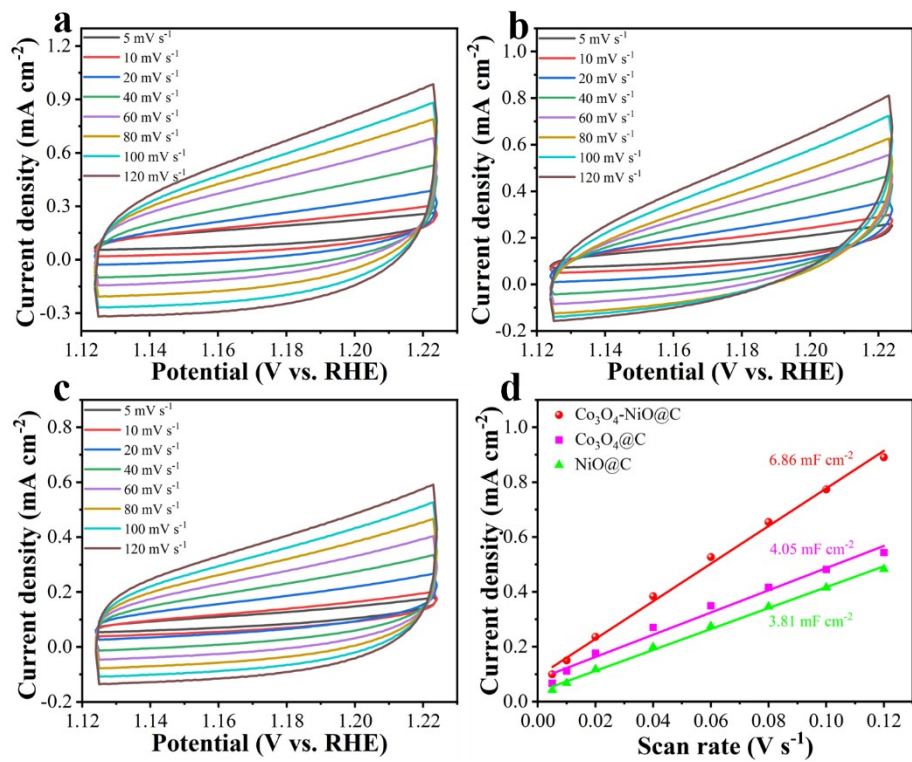

**Fig. S5.** CVs curves of (a) Co<sub>3</sub>O<sub>4</sub>-NiO@C, (b) Co<sub>3</sub>O<sub>4</sub>@C, and (c) NiO@C at various scan rates (5 to 120 mV s<sup>-1</sup>), respectively. (d) Corresponding C<sub>dl</sub> of Co<sub>3</sub>O<sub>4</sub>-NiO@C, Co<sub>3</sub>O<sub>4</sub>@C, and NiO@C.

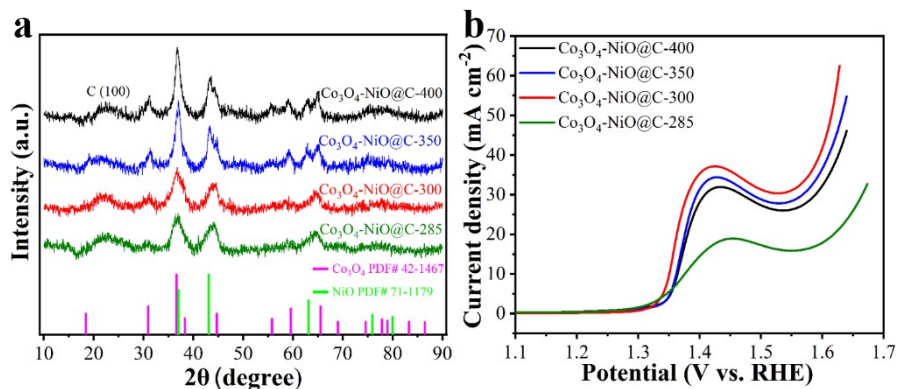

**Fig. S6.** (a) XRD patterns of  $\text{Co}_3\text{O}_4\text{-NiO@C}$  prepared at different calcination temperatures. (b) LSV curves of  $\text{Co}_3\text{O}_4\text{-NiO@C}$  prepared at different calcination temperatures in 1 M aqueous KOH containing 50 mM HMF.

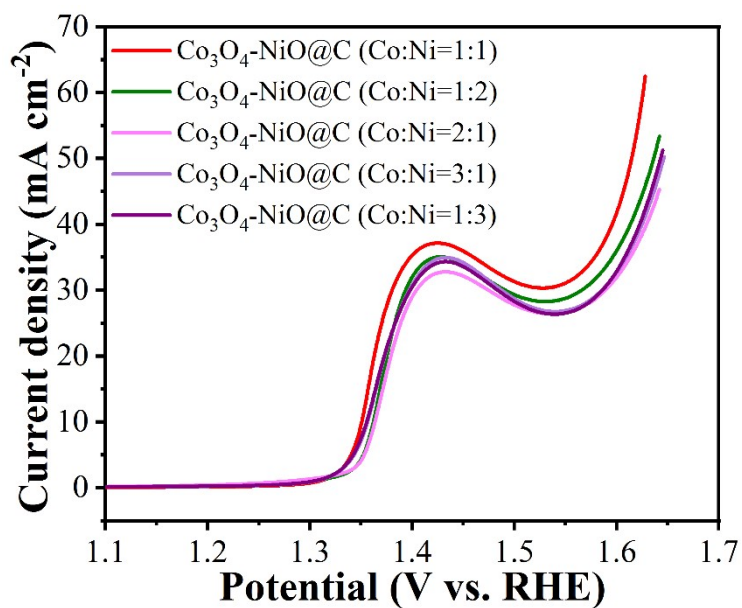

**Fig. S7.** LSV curves of  $\text{Co}_3\text{O}_4\text{-NiO@C}$  prepared at different Co/Ni ratios in the precursors in 1 M KOH + 50 mM HMF aqueous solution.

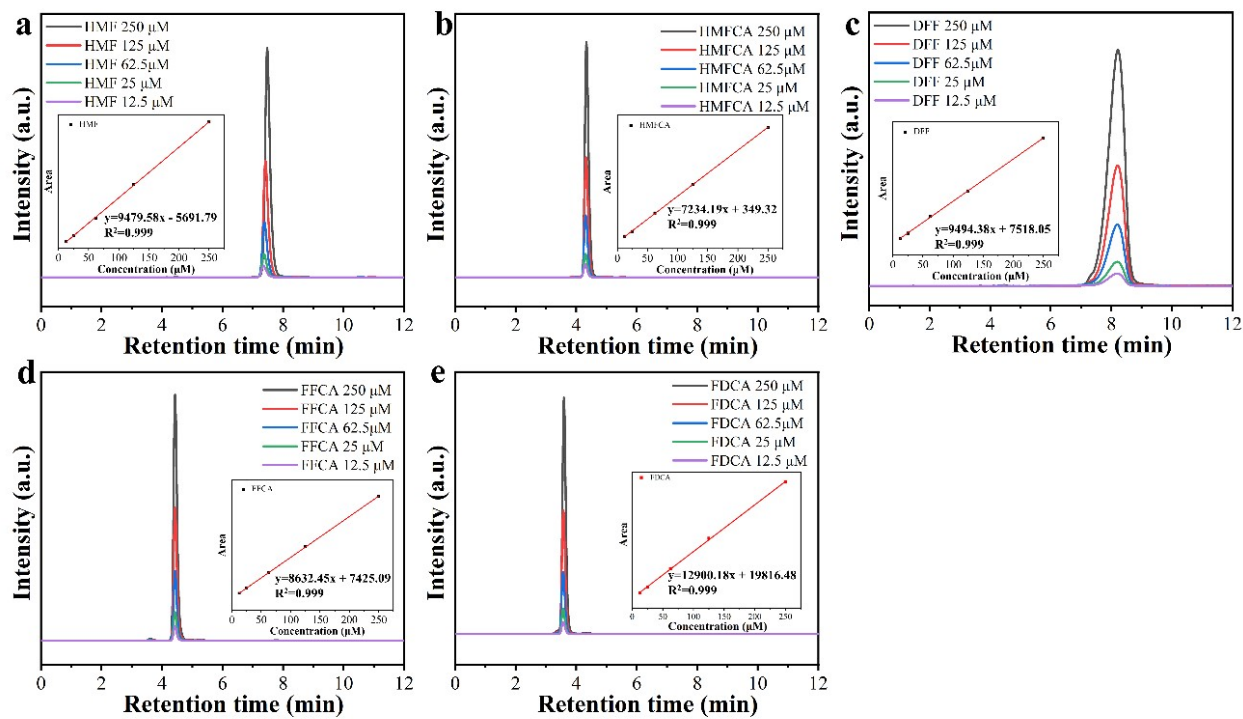

**Fig. S8.** The HPLC standard curves of (a) HMF, (b) HMFCFA, (c) DFF, (d) FFCA, and (e) FDCA.

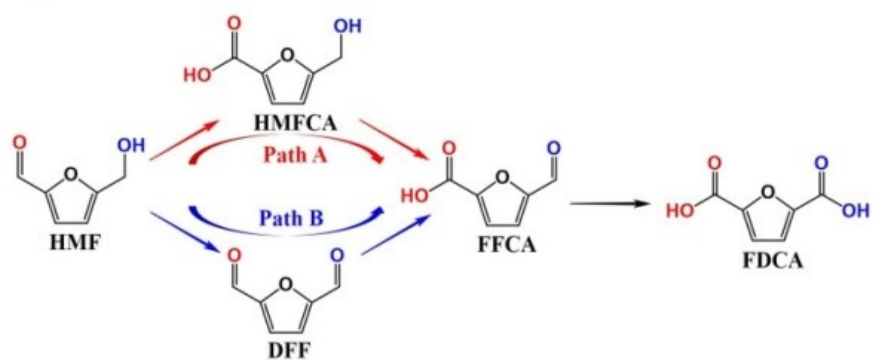

**Fig. S9.** Two possible pathways of HMF oxidation to FDCA.

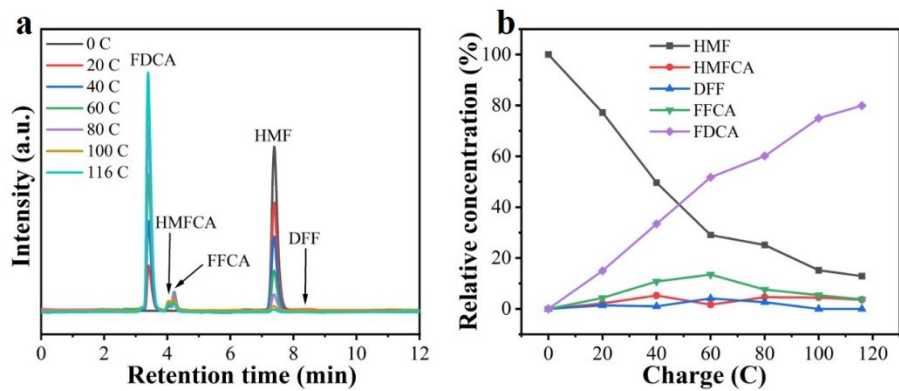

**Fig. S10.** (a) HPLC elution profiles and (b) conversion changes of HMF electrooxidation catalyzed by  $\text{Co}_3\text{O}_4@\text{C}$  with the increasing of charge.

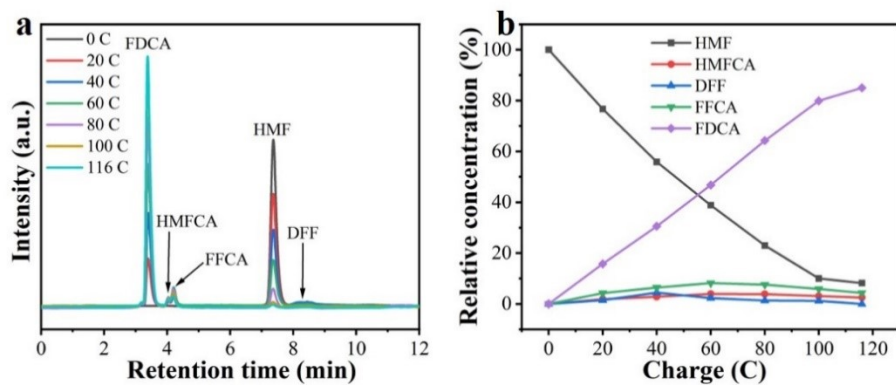

**Fig. S11.** (a) HPLC elution profiles and (b) conversion changes of HMF electrooxidation catalyzed by NiO@C with the increasing of charge.

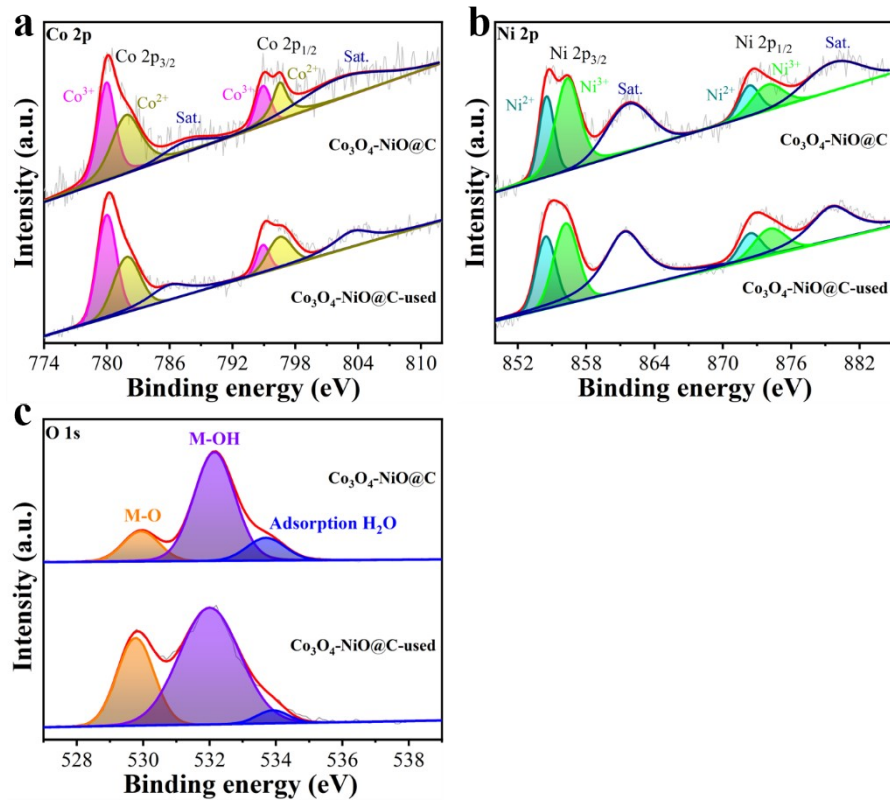

**Fig. S12.** Corresponding high-resolution XPS spectrum of  $\text{Co}_3\text{O}_4\text{-NiO@C}$  and  $\text{Co}_3\text{O}_4\text{-NiO@C-used}$  for (a) Co 2p, (b) Ni 2p and (c) O 1s.

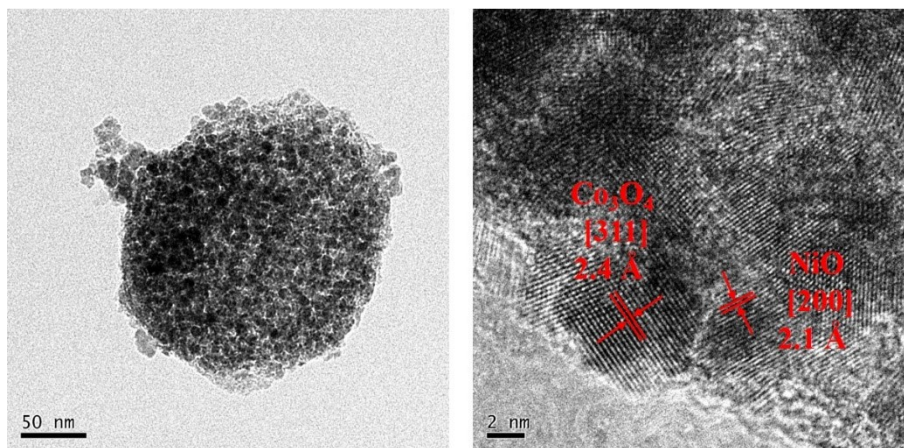

**Fig. S13.** (a) TEM and (b) HRTEM images of the  $\text{Co}_3\text{O}_4\text{-NiO@C}$  after HMFOR.



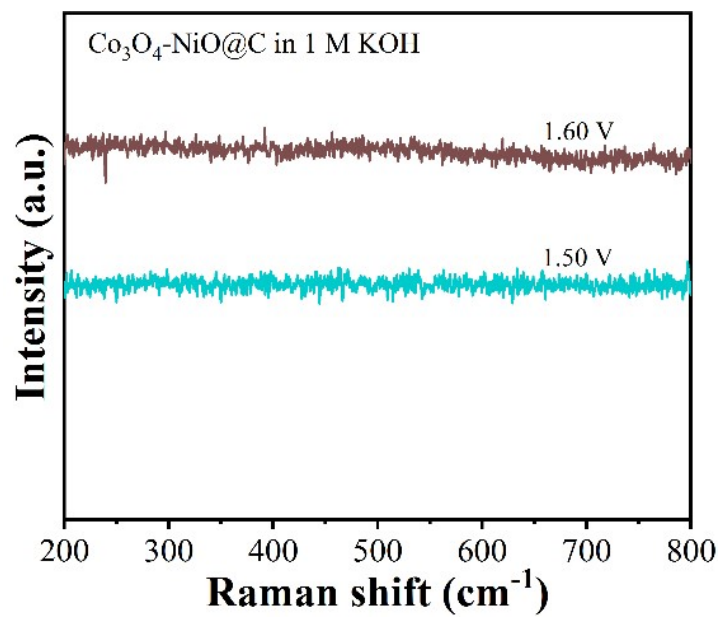

**Fig. S14.** In situ Raman spectra of  $\text{Co}_3\text{O}_4\text{-NiO@C}$  in 1 M aqueous KOH at 1.5 and 1.6 V.

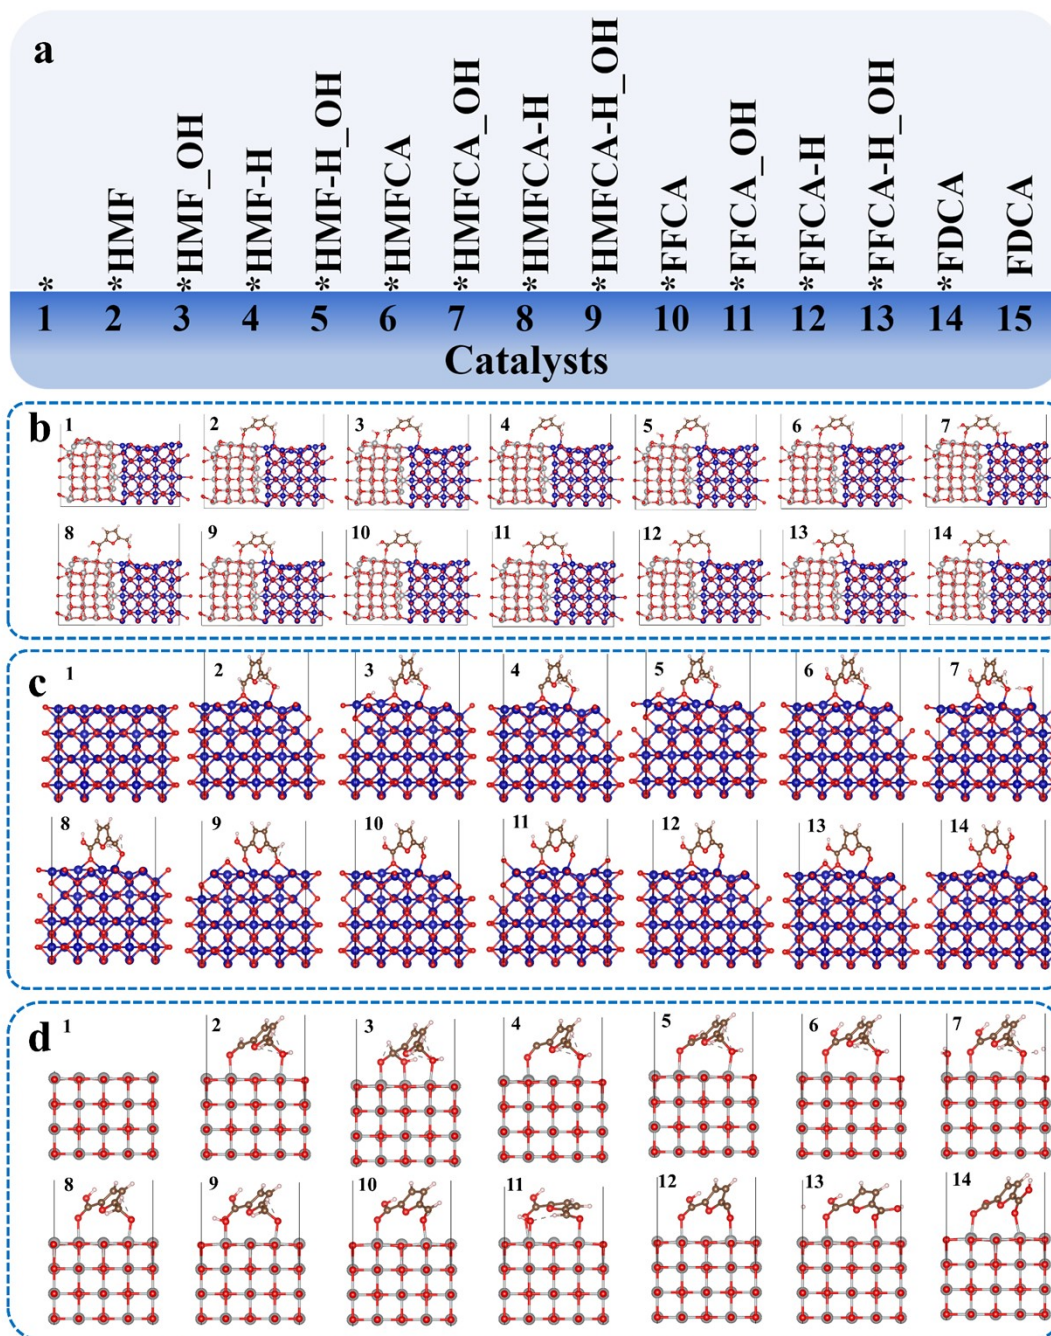

**Fig. S15.** (a) The reaction pathway for HMFOR on the catalysts. Theoretical computational models of the reaction pathway for HMFOR on (b)  $\text{Co}_3\text{O}_4\text{-NiO@C}$ , (c)  $\text{Co}_3\text{O}_4$  and (d)  $\text{NiO}$ .

**Table S1.** Comparison of HMFOR performance for Co<sub>3</sub>O<sub>4</sub>-NiO@C and other reported catalysts.

| <b>Electrocatalyst</b>                | <b>Oxidation Potential (V)</b> | <b>HMF Conversion (%)</b> | <b>FDCA yield (%)</b> | <b>FE (%)</b> | <b>Ref.</b> |
|---------------------------------------|--------------------------------|---------------------------|-----------------------|---------------|-------------|
| Ni <sub>2</sub> P NPA/NF              | 1.423                          | 99.9                      | 99.9                  | 99.7          | 1           |
| Ni <sub>3</sub> S <sub>2</sub> /NF    | 1.423                          | >99                       | 98                    | 98            | 2           |
| Ni <sub>3</sub> N@C                   | 1.4                            | >99                       | 98                    | ~99           | 3           |
| MoO <sub>2</sub> -FeP@C               | 1.424                          | 99.4                      | 98.6                  | 98.7          | 4           |
| NiCoP                                 | 1.464                          | 99.9                      | 98.9                  | 94.2          | 5           |
| CuCo <sub>2</sub> O <sub>4</sub>      | 1.45                           | 98                        | 93.7                  | 94            | 6           |
| NiSe@NiO <sub>x</sub>                 | 1.423                          | 99                        | 98                    | 98            | 7           |
| Ir-Co <sub>3</sub> O <sub>4</sub>     | 1.42                           | >99                       | 98                    | 98            | 8           |
| NiCo <sub>2</sub> O <sub>4</sub> @NF  | 1.5                            | 99.6                      | 90.8                  | 87.5          | 9           |
| CoFe@NiFe                             | 1.5                            | >99                       | 97                    | NA            | 10          |
| Pt/Ni(OH) <sub>2</sub>                | NA                             | >99                       | 98.7                  | ~100          | 11          |
| InOOH-O <sub>v</sub>                  | 1.48                           | 98.5                      | 91.6                  | ~91.5         | 12          |
| Co <sub>3</sub> O <sub>4</sub> -NiO@C | 1.4                            | 99.1                      | 99.1                  | 98.9          | This work   |

**Table S2.** NiO and Co<sub>3</sub>O<sub>4</sub> heterogeneous crystal matching.

|                            | <b>NiO(200)</b> | <b>Co<sub>3</sub>O<sub>4</sub>(220)</b> | <b>Heterojunction</b> | <b>Mis-match<br/>(NiO)</b> | <b>Mis-match<br/>(Co<sub>3</sub>O<sub>4</sub>)</b> |
|----------------------------|-----------------|-----------------------------------------|-----------------------|----------------------------|----------------------------------------------------|
| <b>a</b>                   | 8.295           | 8.046                                   | 8.209                 | -0.76%                     | +1.8%                                              |
| <b>b</b>                   | 12.442          | 11.379                                  | 11.911                | -4.27%                     | +4.68%                                             |
| <b><math>\alpha</math></b> | 90              | 90                                      | 90                    | 0                          | 0                                                  |
| <b><math>\beta</math></b>  | 90              | 90                                      | 90                    | 0                          | 0                                                  |
| <b><math>\gamma</math></b> | 90              | 90                                      | 90                    | 0                          | 0                                                  |

## References

1. B. You, N. Jiang, X. Liu and Y. Sun, *Angew. Chem. Int. Ed.*, 2016, **55**, 9913-9917.
2. B. You, X. Liu, N. Jiang and Y. Sun, *J. Am. Chem. Soc.*, 2016, **138**, 13639-13646.
3. N. Zhang, Y. Zou, L. Tao, W. Chen, L. Zhou, Z. Liu, B. Zhou, G. Huang, H. Lin and S. Wang, *Angew. Chem. Int. Ed.*, 2019, **131**, 16042-16050.
4. G. Yang, Y. Jiao, H. Yan, Y. Xie, A. Wu, X. Dong, D. Guo, C. Tian and H. Fu, *Adv. Mater.*, 2020, **32**, 2000455-2000464.
5. H. Wang, C. Li, J. An, Y. Zhuang and S. Tao, *J. Mater. Chem. A*, 2021, **9**, 18421-18430.
6. Y. Lu, C. L. Dong, Y. C. Huang, Y. Zou, Z. Liu, Y. Liu, Y. Li, N. He, J. Shi and S. Wang, *Angew. Chem. Int. Ed.*, 2020, **59**, 19215-19221.
7. L. Gao, Z. Liu, J. Ma, L. Zhong, Z. Song, J. Xu, S. Gan, D. Han and L. Niu, *Appl. Catal. B- Environ.*, 2020, **261**, 118235.
8. Y. Lu, T. Liu, C. L. Dong, Y. C. Huang, Y. Li, J. Chen, Y. Zou and S. Wang, *Adv. Mater.*, 2021, **33**, 2007056.
9. M. J. Kang, H. Park, J. Jegal, S. Y. Hwang, Y. S. Kang and H. G. Cha, *Appl. Catal. B-Environ.*, 2018, **242**, 85-91.
10. Y. Xie, Z. Zhou, N. Yang and G. Zhao, *Adv. Funct. Mater.*, 2021, **31**, 2102886.
11. B. Zhou, Y. Li, Y. Zou, W. Chen, W. Zhou, M. Song, Y. Wu, Y. Lu, J. Liu, Y. Wang and S. Wang, *Angew. Chem. Int. Ed.*, 2021, **60**, 22908-22914.
12. F. Ye, S. Zhang, Q. Cheng, Y. Long, D. Liu, R. Paul, Y. Fang, Y. Su, L. Qu, L. Dai and C. Hu, *Nat. Commun.*, 2023, **14**, 2040.
